# The American Journal of Psychiatry

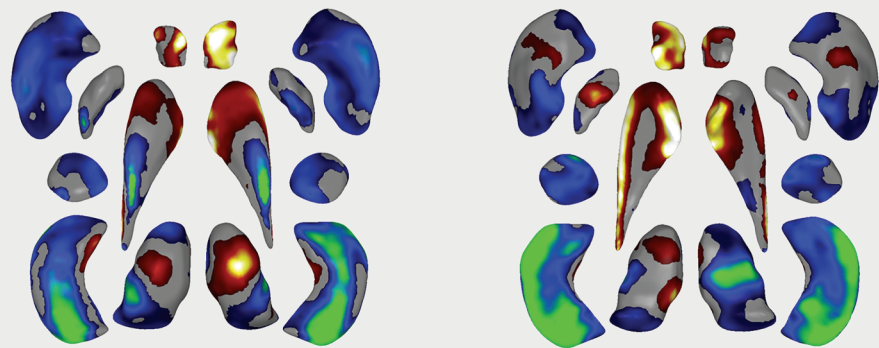

Mapping Subcortical Brain Alterations in 22q11.2 Deletion Syndrome:  
Effects of Deletion Size and Convergence With  
Idiopathic Neuropsychiatric Illness

Neural Insensitivity to the Effects of Hunger in Women  
Remitted From Anorexia Nervosa

U.S. Adults With Pain, a Group Increasingly Vulnerable to  
Nonmedical Cannabis Use and Cannabis Use Disorder

Association Between the Use of Cannabis and  
Physical Violence in Youths
